# Supplementary material for: Physical and chemical characterisation of PM emissions from two ships operating in European Emission Control Areas
Source: Copernicus journal article supplement (doi:10.5194/amt-6-3577-2013), 2013-12-17
Supplement: Supplementary file 1 [file amt-6-3577-2013-supplement.pdf]

## Supplement Information

### Physical and chemical characterisation of PM emissions from two ships operating in European Emission Control Areas

Moldanová, J., Fridell, E., Winnes, H., Holmin-Fridell, S., Boman, J., Jedynska, A., Tishkova, V., Demirdjian, B., Joulie, S., Bladt, H., Ivleva, N., P., Niessner, R.

**Table S1. Properties of the investigated ships**

| Ship | Type        | Length [m] | Gross tonnage | Built year | Max/average speed [knots] |
|------|-------------|------------|---------------|------------|---------------------------|
| S1   | Dry cargo   | 166        | 18 773        | 1987       | 14.9/13.0                 |
| S2   | RoPax Ferry | 240        | 46 353        | 2001       | 21.5/17.7                 |

**Table S2. Engine parameters for the campaign experiments. S1, S2: ships investigated; HFO1%, HFO0.5%: HFO used by the investigated engine with approximate fuel sulphur content, ME-full, ME-low: main engine with full and low engine-load conditions**

| Measurement/<br>Engine parameter        | S1_<br>HFO1%<br>_ME-full | S1_<br>HFO1%<br>_ME-low | S1_<br>MGO<br>_AE | S2_<br>HFO1%<br>_ME-full | S2_<br>HFO0.5%<br>_ME-full | S2_<br>MGO<br>_ME-full |
|-----------------------------------------|--------------------------|-------------------------|-------------------|--------------------------|----------------------------|------------------------|
| Fuel consumption (kg/h)                 | 760                      | 257                     | 83                | 648                      | 635                        | 619                    |
| Fuel consumption (g/kWh)                | 211.5                    | 192.3                   | 203.9             | 189.4                    | 185.7                      | 181.0                  |
| Power (kW)                              | 3 592                    | 1 336                   | 405               | 3 420                    | 3 420                      | 3 420                  |
| Nominal engine speed (rpm)              | 750                      | 750                     | 1 000             | 510                      | 510                        | 510                    |
| Actual engine speed (rpm)               | 720                      | 570                     | 870               | 435                      | 435                        | 435                    |
| Gas flow in stack (nm <sup>3</sup> /h)* | 20 922                   | 7 667                   | 2415              | 16 283                   | 16 200,<br>14 600          | 16 800                 |
| Temperature in exhaust gas (°C)         | 292                      | 290                     | 302               | 360                      | 360                        | 360                    |

\* Calculated from fuel consumption and fuel composition, normalised to 273.15 K

**Table S3. Results of fuel (column 3-7) and lubricant (column 8,9) analyses. Lubricants in investigated main engines on S1 and S2 ships were analysed.**

|                        |                   | S1_<br>HFO1%<br>_ME | S2_<br>HFO1%<br>_ME | S2_<br>HFO0.5%<br>_ME | S1_<br>MGO<br>_AE | S2_<br>MGO<br>_ME | S1_<br>Lub<br>_ME | S2_<br>Lub<br>_ME | Uncertainty |       |       |
|------------------------|-------------------|---------------------|---------------------|-----------------------|-------------------|-------------------|-------------------|-------------------|-------------|-------|-------|
| Unit                   |                   |                     |                     |                       |                   |                   |                   |                   | HFO         | MGO   | Lub   |
| Density<br>(15°C)      | kg/m <sup>3</sup> | 977.3               | 988.7               | 943.3                 | 834.1             | 846.4             | 908.3             | 927               | ±1.5        | ±0.5  | ±1.5  |
| Water                  | % V/V             | <0.10               | 0.14                | <0.10                 | <0.10             | <0.10             | 0.3               | 0.11              | -           | -     | -     |
| S                      | % m/m             | 0.91                | 0.96                | 0.58                  | 0.03              | 0.1               | 0.53              | 0.92              | ±10%        | ±34%  | ±10%  |
| Ash                    | % m/m             | 0.02                | 0.02                | 0.01                  | <0.01             | <0.01             | 2.7               | 2.7               | ±67%        | -     | ±1.5% |
| V                      | mg/kg             | 34                  | 20                  | 6                     | <1                | <1                | 20                | 71                | ±58%        | -     | ±41%  |
| Na                     | mg/kg             | 8                   | 11                  | 7                     | <1                | <1                | 20                | 32                | ±41%        | -     | ±25%  |
| Al                     | mg/kg             | 16                  | 20                  | 16                    | <1                | <1                | 6                 | 4                 | ±34%        | -     | ±34%  |
| Si                     | mg/kg             | 14                  | 18                  | 15                    | <1                | <1                | 8                 | 18                | ±33%        | -     | ±33%  |
| Fe                     | mg/kg             | 16                  | 9                   | 7                     | <1                | <1                | 10                | 25                | ±34%        | -     | ±28%  |
| Ni                     | mg/kg             | 16                  | 15                  | 9                     | <1                | <1                | 12                | 60                | ±54%        | -     | ±41%  |
| Ca                     | mg/kg             | 5                   | 8                   | 4                     | <1                | <1                | 8230              | 7670              | ±36%        | -     | ±2.8% |
| Mg                     | mg/kg             | <1                  | 1                   | <1                    | <1                | <1                | 38                | 37                | ±>100%      | -     | ±15%  |
| Pb                     | mg/kg             | <1                  | <1                  | <1                    | <1                | <1                | <1                | <1                | -           | -     | -     |
| Zn                     | mg/kg             | 2                   | 1                   | 2                     | <1                | <1                | 330               | 440               | ±44%        | -     | ±8.6% |
| P                      | mg/kg             | <1                  | <1                  | <1                    | <1                | <1                | 279               | 266               | -           | -     | ±18%  |
| K                      | mg/kg             | <1                  | 1                   | <1                    | <1                | <1                | 5                 | 7                 | ±>100%      | -     | ±20%  |
| C                      | % m/m             | 87.51               | 87.93               | 87.13                 | 86.02             | 86.29             | -                 | -                 | ±2.8%       | ±2.8% | -     |
| H                      | % m/m             | 11.01               | 10.68               | 12.11                 | 13.66             | 13.54             | -                 | -                 | ±6.9%       | ±6.3% | -     |
| N                      | % m/m             | 0.39                | 0.42                | 0.3                   | <0.10             | <0.10             | -                 | -                 | ±>100%      | -     | -     |
| O                      | % m/m             | 0.35                | 0.44                | 0.34                  | <0.30             | <0.30             | -                 | -                 | ±>100%      | -     | -     |
| Net speci-<br>fic heat | MJ/kg             | 41.09               | 40.86               | 41.67                 | 42.92             | 42.75             | -                 | -                 | ±1.0%       | ±0.9% | -     |

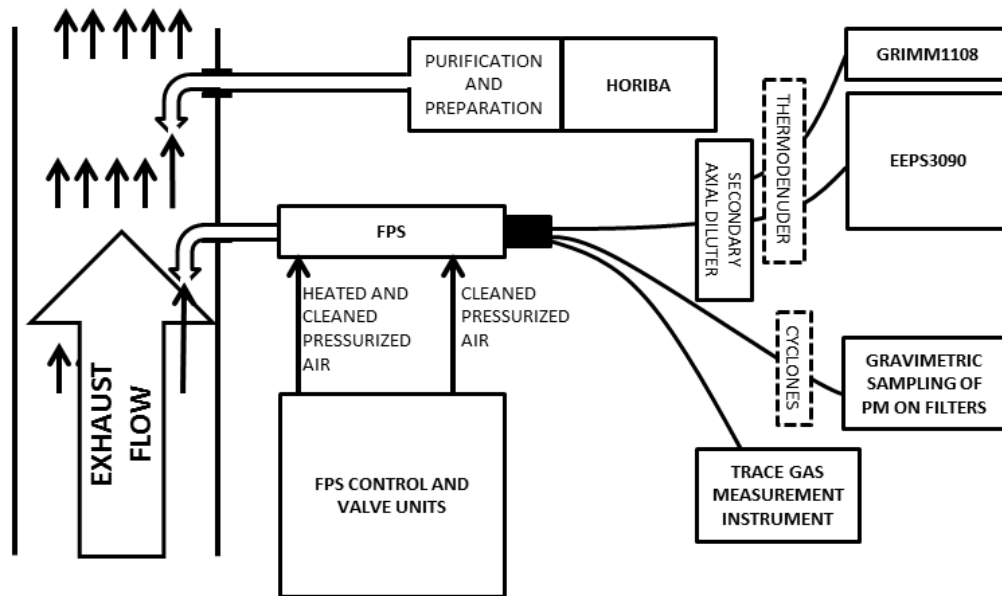

Figure S1. The measurement setup. Exhaust was sampled through an isokinetic probe to the Dekati Fine Particle Sampler (FPS control and valve unit) and led to the flow divider. From the flow divider one line was led through secondary dilution step (Dekati DAD-100) and optionally thermodenuder (Dekati ELA 423) to EEPS (Engine Exhaust Particle Sizer, Model 3090, TSI Inc.) and aerosol spectrometer (GRIMM 1.108). Second line was led optionally through PM<sub>2.5</sub> and PM<sub>10</sub> cyclones followed by filter holders. The vacuum pumps behind the filter holders were connected to gas meters and rotameters for sample flow velocity and volume control. The third line was also led to trace gas measurement instrument for supervision of the dilution. Gas sampling was performed from a second probe in the exhaust channel.

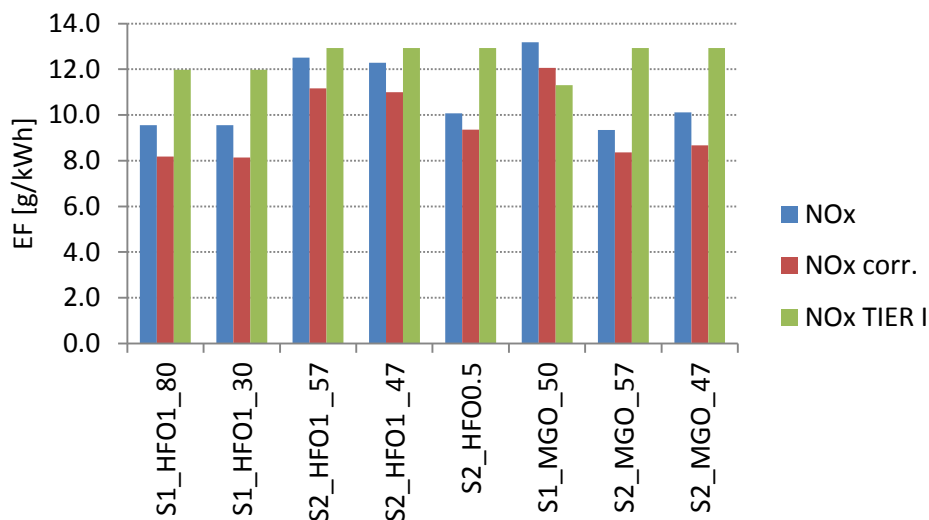

Figure S2. Emission factors for NO<sub>x</sub> measured on investigated engines. NO<sub>x</sub> corr. is EF(NO<sub>x</sub>) corrected for ambient conditions (humidity and temperature) as in ISO 8178-1 1996 clause 13.3, NO<sub>x</sub> TIER I is the maximum allowed EF(NO<sub>x</sub>) for the engine calculated according to the TIER I NO<sub>x</sub> emission standard.

a) S1\_HFO1%\_ME-full

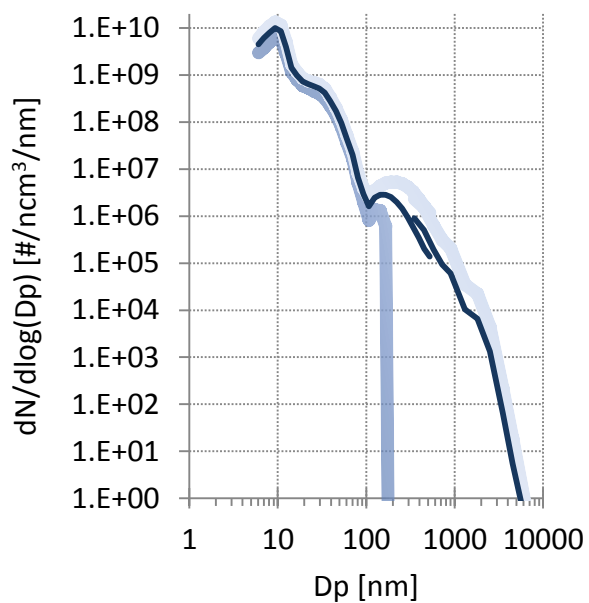

b) S1\_HFO1%\_ME-low

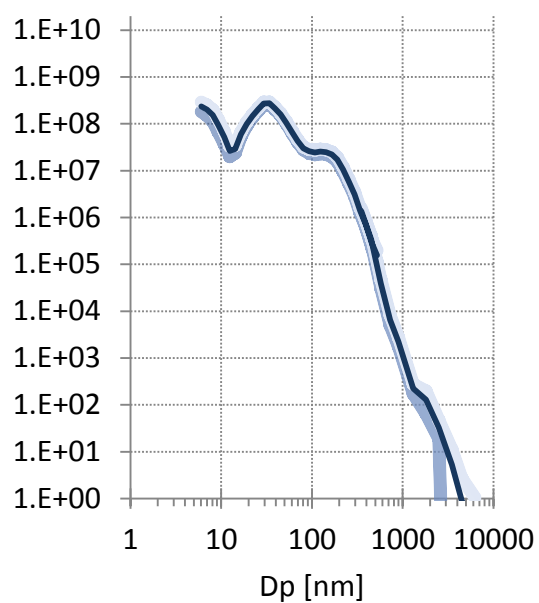

c) S1\_MGO\_AE

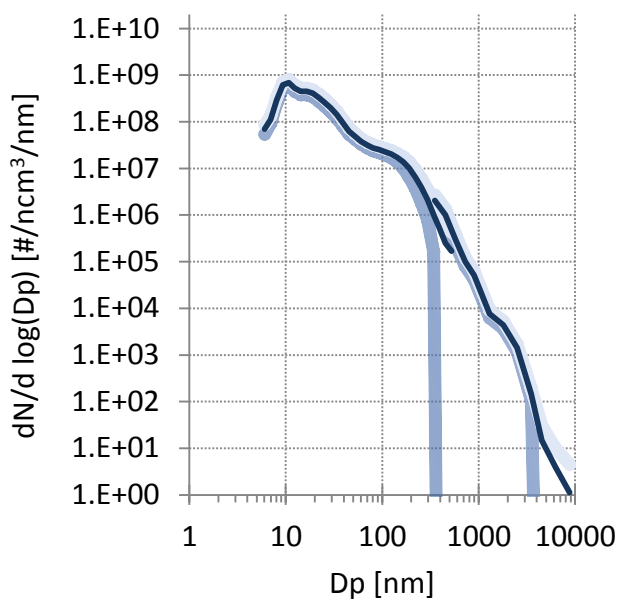

**Figure S3 Particle number distributions for 3 different experiments on ship S1. The light-blue line shows 1 standard deviation interval around the mean. In size range 300-500 nm the double lines represent results from EEPS and GRIMM instruments, respectively.**

**Table S4. Emission factors in mg kg<sup>-1</sup> fuel for elements in PM analysed by EDXRF (S and Ca analysed also as SO<sub>4</sub><sup>2-</sup> and Ca<sup>+</sup> by IC) on filter samples. In the upper part are presented mean emission factors, in the middle part EF resulted from analyses performed in the 2 laboratories are shown. In the bottom part, mean relative uncertainties (Rel. uc. = mean uncertainty/mean concentration of a group of samples) for 4 groups of samples (S1 HFO, S1 MGO, S2 HFO, S2 MGO) are presented together with mean coefficient of variance (CV) of the investigated multiple samples (2 triplets sampled in HFO exhaust).**

| Sample type |          |              |       | S     | V     | Ni    | Fe    | Cr    | Mg    | Al    | Si    | Co    | K      | P     | Zn    | Ca    |
|-------------|----------|--------------|-------|-------|-------|-------|-------|-------|-------|-------|-------|-------|--------|-------|-------|-------|
| S1          | HFO 1%   | ME-full      | PM1   | 88.5  | 21.0  | 13.6  | 5.5   | 0.29  | 2.1   | 2.3   | 2.3   | <d.l. | 0.31   | 1.8   | 1.1   | 7.6   |
| S1          | HFO 1%   | ME-full      | PM10  | 34.8  | 20.3  | 13.6  | 5.8   | 0.40  | 5.4   | 3.1   | 2.1   | <d.l. | 0.05   | 1.0   | 1.1   | 8.3   |
| S1          | HFO 1%   | ME-full      | TSP   | 102.0 | 19.8  | 16.1  | 5.0   | <d.l. | <d.l. | <d.l. | <d.l. | <d.l. | <d.l.  | <d.l. | 3.6   | 15.7  |
| S1          | HFO 1%   | ME-low       | PM1   | 18.1  | 12.6  | 9.6   | 3.3   | <d.l. | <d.l. | <d.l. | <d.l. | <d.l. | <d.l.  | <d.l. | 0.64  | 2.2   |
| S1          | HFO 1%   | ME-low       | PM10  | 18.0  | 7.4   | 5.6   | 1.7   | <d.l. | <d.l. | <d.l. | <d.l. | <d.l. | 2.0    | <d.l. | 0.30  | 0.9   |
| S1          | HFO 1%   | ME-low       | TSP   | 18.0  | 9.9   | 9.2   | 4.3   | <d.l. | <d.l. | <d.l. | <d.l. | <d.l. | 2.5    | <d.l. | 7.6   | 2.4   |
| S2          | HFO 1%   | ME-full      | PM2.5 | 36.3  | 8.9   | 7.9   | 1.3   | 0.08  | <d.l. | 0.11  | 0.97  | 0.44  | <d.l.  | <d.l. | 0.35  | 2.3   |
| S2          | HFO 1%   | ME-full      | PM10  | 37.6  | 8.5   | 8.1   | 1.4   | 0.13  | 0.9   | 0.97  | 0.22  | 0.35  | <d.l.  | <d.l. | 0.24  | 2.1   |
| S2          | HFO 0.5% | ME-full      | PM2.5 | 22.6  | 2.3   | 5.7   | 0.65  | 0.09  | 0.3   | 0.45  | <d.l. | 0.35  | <d.l.  | <d.l. | 0.35  | 1.6   |
| S2          | HFO 0.5% | ME-full      | PM10  | 28.5  | 2.5   | 6.3   | 0.91  | <d.l. | 1.0   | 0.97  | <d.l. | 0.26  | <d.l.  | <d.l. | 0.16  | 1.9   |
| S2          | MGO      | ME-full      | PM2.5 | 1.1   | 0.21  | <d.l. | 0.048 | 0.02  | <d.l. | <d.l. | 0.28  | <d.l. | <d.l.  | <d.l. | <d.l. | 1.3   |
| S2          | MGO      | ME-full      | PM10  | 1.6   | 0.17  | 0.068 | 0.052 | 0.11  | <d.l. | <d.l. | 0.14  | <d.l. | <d.l.  | <d.l. | 0.24  | 1.3   |
| S1          | MGO      | AE           | PM1   | 2.4   | 0.007 | 0.015 | 0.098 | 0.17  | 2.8   | 0.97  | 0.16  | <d.l. | <bl.   | 0.047 | 1.2   | 7.8   |
| S1          | MGO      | AE           | PM10  | 2.6   | 0.007 | 0.015 | 0.098 | 0.17  | <d.l. | <d.l. | <d.l. | <d.l. | <d.l.  | <d.l. | 1.4   | 9.5   |
| S1          | MGO      | AE           | TSP   | 2.7   | <d.l.  | <d.l. | 1.7   | 11.2  |
| S1          | HFO 1%   | Lab1         | PM2.5 | 66.9  | 18.0  | 13.8  | 5.3   | <d.l. | -     | -     | -     | 0.6   | <d.l.  | -     | 1.1   | 5.6   |
| S1          | HFO 1%   | Lab 2        | PM2.5 | 78.3  | 23.9  | 13.5  | 5.7   | 0.3   | 2.1   | 2.3   | 2.3   | 0.7   | 0.3    | 1.8   | 1.0   | 9.6   |
| S1          | HFO 1%   | Lab 1        | PM10  | 23.7  | 20.1  | 14.9  | 5.7   | <d.l. | -     | -     | -     | 0.6   | <d.l.  | -     | 1.3   | 7.2   |
| S1          | HFO 1%   | Lab 2        | PM10  | 45.8  | 20.6  | 12.3  | 5.9   | 0.4   | 5.4   | 3.1   | 2.1   | 0.6   | 0.1    | 1.0   | 0.8   | 9.4   |
| S1          | MGO      | Lab 1        | PM2.5 | <d.l. | <d.l. | <d.l. | <b.v. | <d.l. | -     | -     | -     | <d.l. | <d.l.  | -     | 1.4   | 7.3   |
| S1          | MGO      | Lab 2        | PM2.5 | 2.3   | 0.007 | 0.015 | 0.20  | 0.17  | 2.8   | 1.0   | 0.16  | <b.v. | <b.v.  | 0.047 | 0.9   | 8.4   |
| S1          | Rel. uc. | HFO 1%       |       | 3.6%  | 3.8%  | 3.7%  | 4.0%  | 42.9% | 17.9% | 9.9%  | 8.8%  | 11.1% | -      | 11.9% | 14.1% | 5.3%  |
| S2          | Rel. uc. | HFO 1%, 0.5% |       | 3.6%  | 5.5%  | 4.1%  | 12.5% | >100% | 45.7% | 44.0% | 25.6% | 20.8% | -      | -     | 37.6% | 11.0% |
| S1          | Rel. uc. | MGO          |       | 4.2%  | -     | -     | 20.5% | 40.8% | 13.0% | 14.0% | 52.0% | -     | -      | >100% | 7.7%  | 4.5%  |
| S2          | Rel. uc. | MGO          |       | 5.0%  | 48.1% | 87.1% | >100% | >100% | -     | -     | 43.3% | -     | -      | -     | 41.5% | 14.1% |
| S1, S2      | Mean CV  | HFO 1%       |       | 15.2% | 12.2% | 10.1% | 14.9% | 78.5% | 47.1% | 31.8% | 19.0% | 20.1% | 141.4% | 19.3% | 31.4% | 16.8% |

**Table S4. Sample Pearson correlation coefficients  $r$  for emission factors for elements measured by EDXRF on filter samples and for EF(PM mass) measured on the same samples. Three groups with high correlation are marked with different colours. Correlation is based on 15 samples, in the magenta group only 5-6 pairs had both masses above the detection limit.**

[illegible]

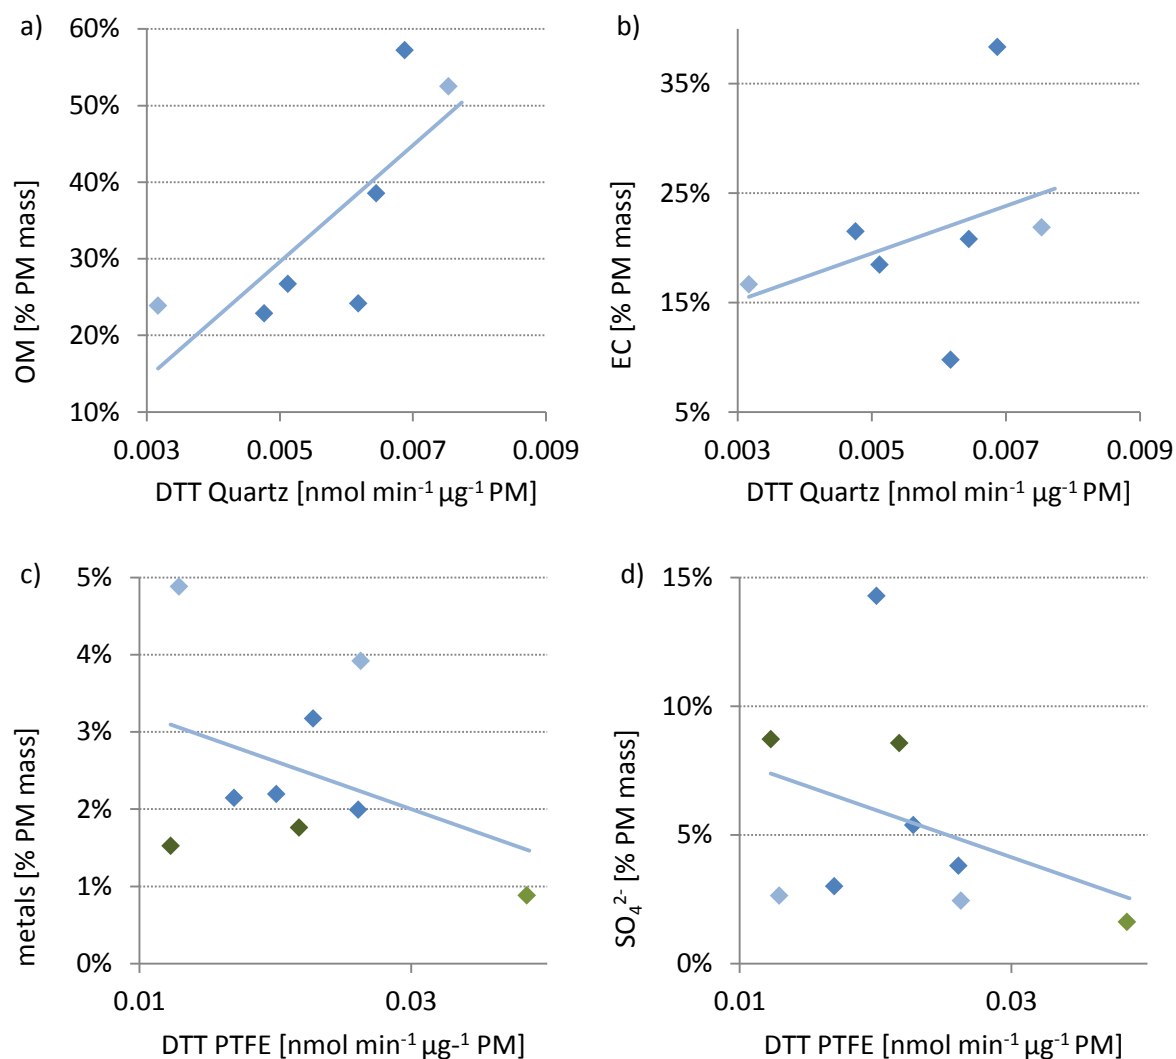

**Figure S4. Relative contributions of PM compounds to PM mass (in wt%) plotted against oxidative potential measured on quartz (a, b) and PTFE (c, d) filter samples. a – OM, b – BC, c – metals analysed with EDXRF, d – sulphate calculated from S analysed by EDXRF. Color coding of points: dark blue – HFO fuel, S1, light blue – MGO fuel S1, dark green – HFO fuels S2, light green – MGO fuel S2.**

a)

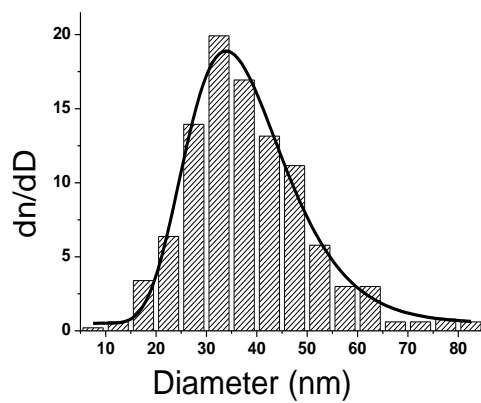

b)

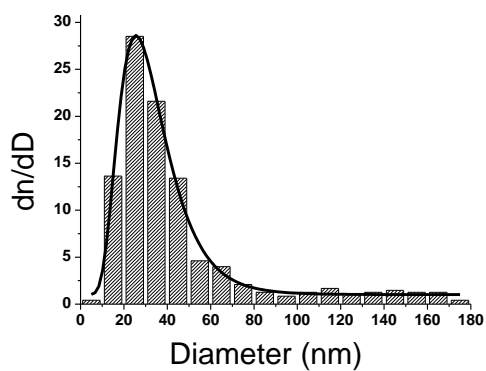

**Figure S5. Size distribution of primary soot-type particle and its lognormal fit (solid line) for a – S1\_HFO1%\_ME-full experiment (based on 502 images) and b – S1\_MGO\_AE experiment (based on 477 images)**



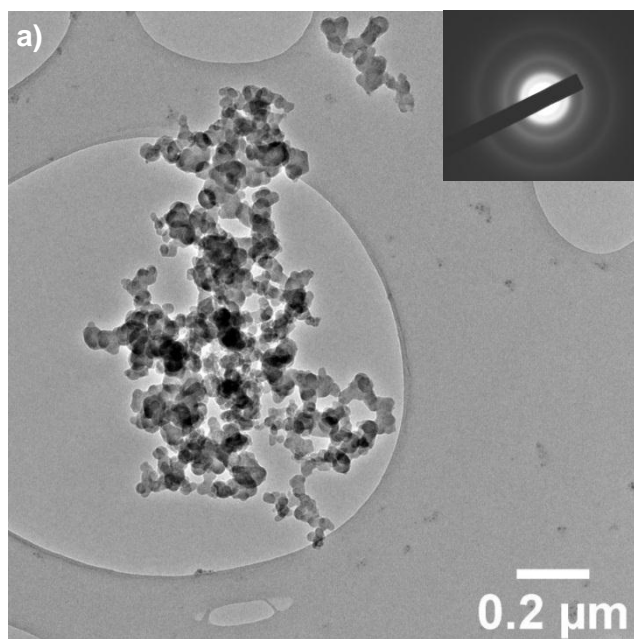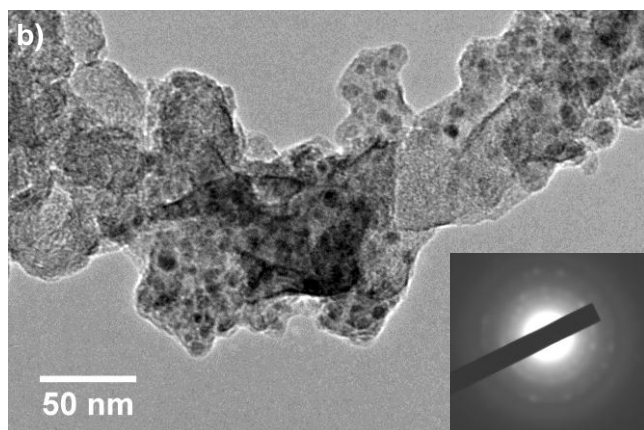

**Figure S6. a – transmission electron microscopy (TEM) picture of a small soot-type aggregate and its corresponding SAED pattern, b - zoom on soot-type particles with dark dots and its associated SAED pattern**

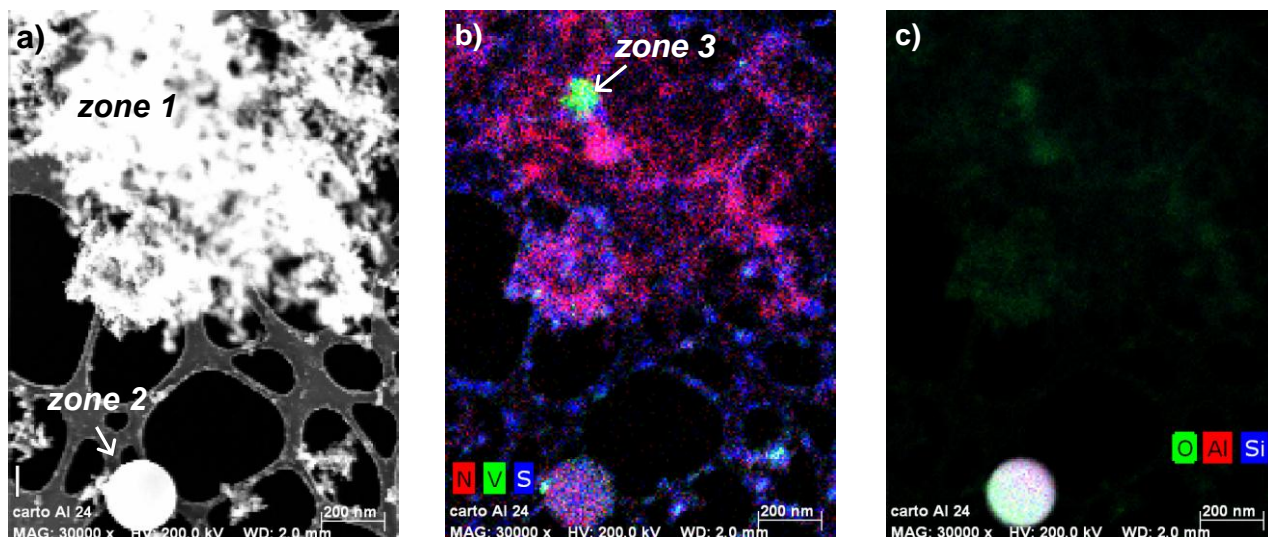

Figure S7. a – STEM image of an agglomerate of soot-type particles (zone 1, composition: C - 84.0 wt%, O - 5.4 wt%, and N - 13.3 wt%, traces <0.1 wt% V, Ni, S and Si) and char-mineral particle (zone 2, composition: O - 58.7 wt%, Al - 24.5 wt%, Si - 16.8 wt%) from the S1\_HFO1%\_ME-full experiment. b, c – elemental composition maps for V, N, and S (b) and for O, Al and Si (c) of particles on image a. Zone 3 in image b is a particle dominated by V with 14.6 wt% of O and traces of Ca, S and Ni.

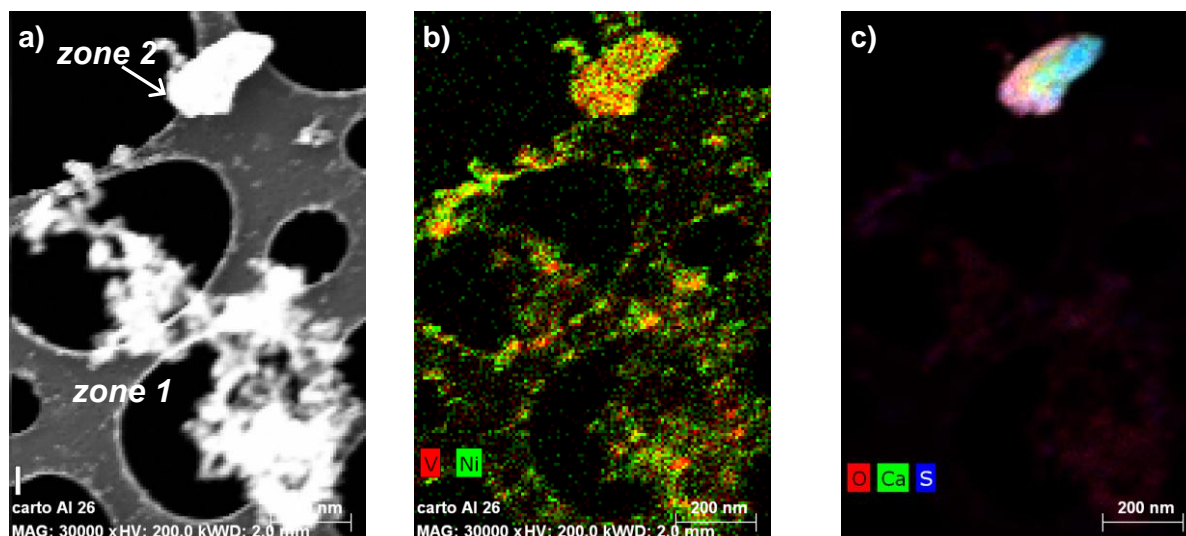

Figure S8. a – STEM image of a soot agglomerate (zone 1) and a char-mineral particle (zone 2) from the S1\_HFO1%\_ME-full experiment. Composition of the soot agglomerate: C 76.8 wt%, N 17.2 wt%, O 5.9 wt%, traces of V, Ca and S (about 0.1 wt% of each element). b, c – elemental composition map for V and Ni (b) and for O, Ca and S (c) of particles in a.

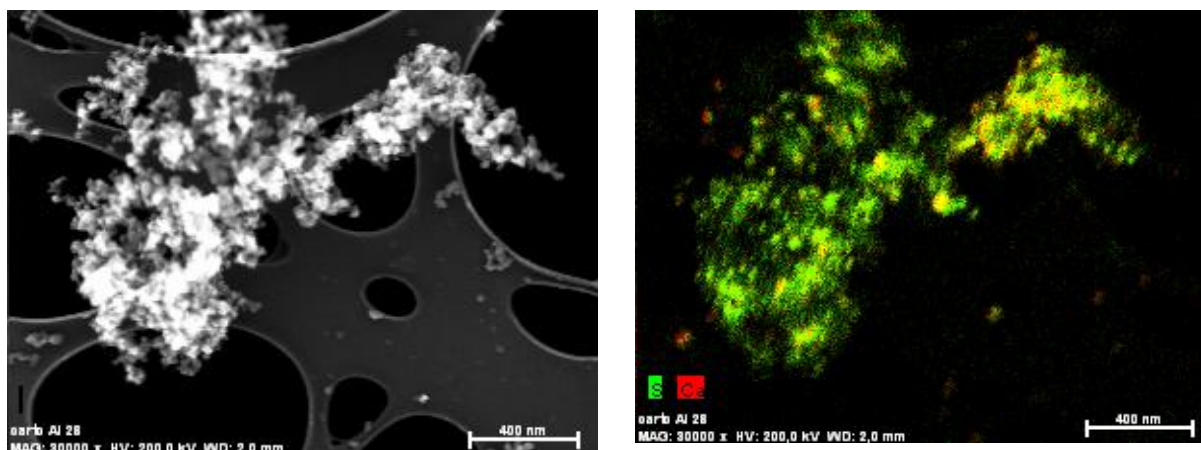

Figure S9. a – STEM image of a soot agglomerate collected in S1\_MGO\_AE experiment. b – elemental composition map for Ca, and S of the soot agglomerate in a.

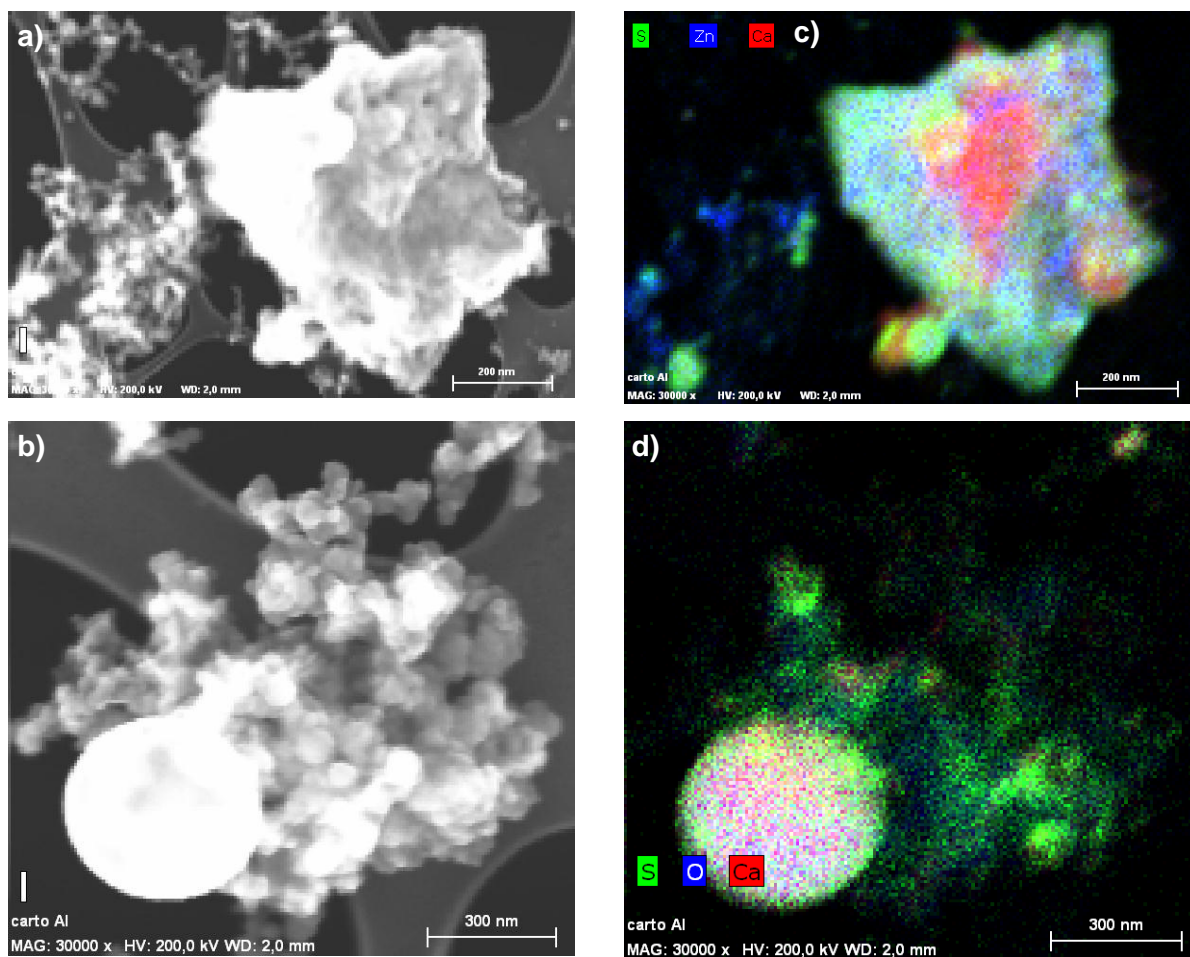

Figure S10. a, b – STEM image of a char-mineral particle and soot particles collected in S1\_MGO\_AE experiment. Composition of the char-mineral particle in a: C 66.5 wt%, O 24.8 wt%, Ca 7.8 wt%, S 0.7 wt%, P 0.2 wt%; Composition of the char-mineral particle in b: C 73.3wt%, O 24.3 wt%, Ca 2.1 wt%, S 0.3 wt%. c – elemental composition map for Ca, S and Zn of particles in a. d – elemental composition map for Ca, S and O of particles in b.



a)

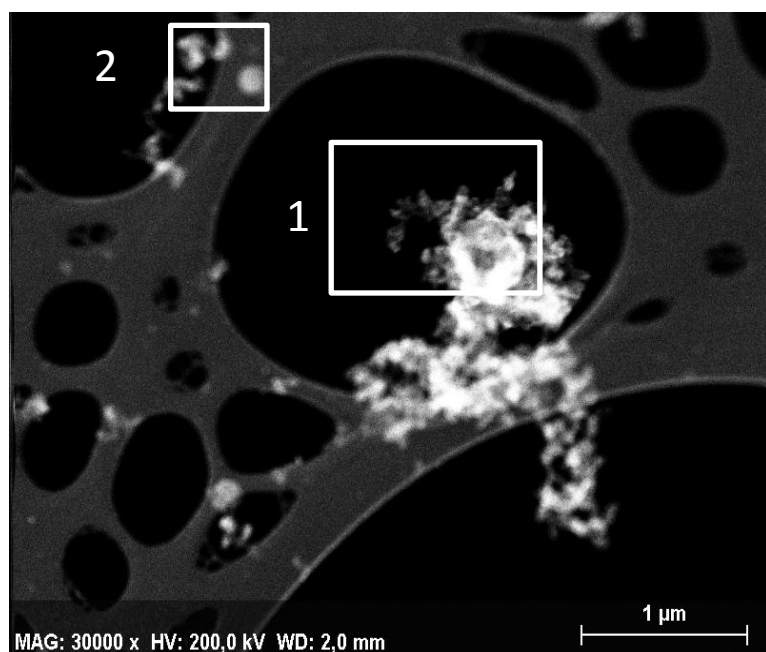

b)

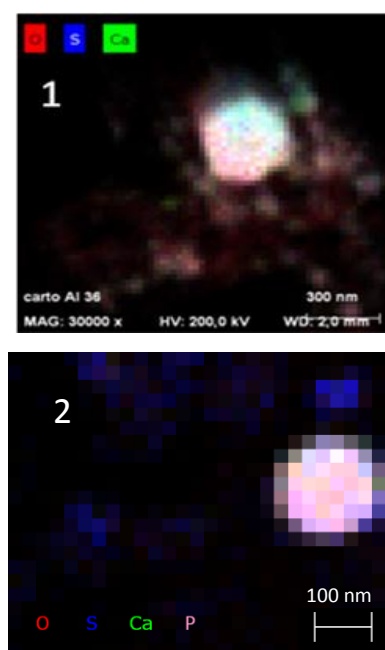

**Figure S11. a - STEM image of soot agglomerates with a large (~500 nm) char-mineral particle (zone 1) and smaller char-mineral particle (zone 2). Composition of char-mineral particle in zone 1: C 58.4 wt%, O 35.1 wt%, Ca 3.7 wt%, S 2.8 wt%; composition in zone 2: C 51.7 wt%, O 39.8 wt%, Ca 5.6 wt%, P 2.9 wt% and S 0.1 wt%. The small particles have traces of S only. b - elemental composition map corresponding to the zone 1 (O, S, Ca) and zone 2 (O, S, Ca, P) in a.**

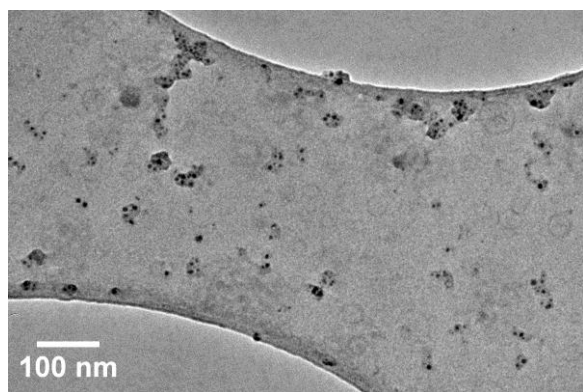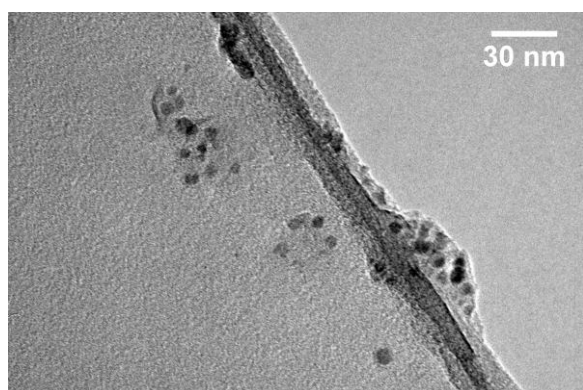

**Figure S12. TEM image of organic particles.**

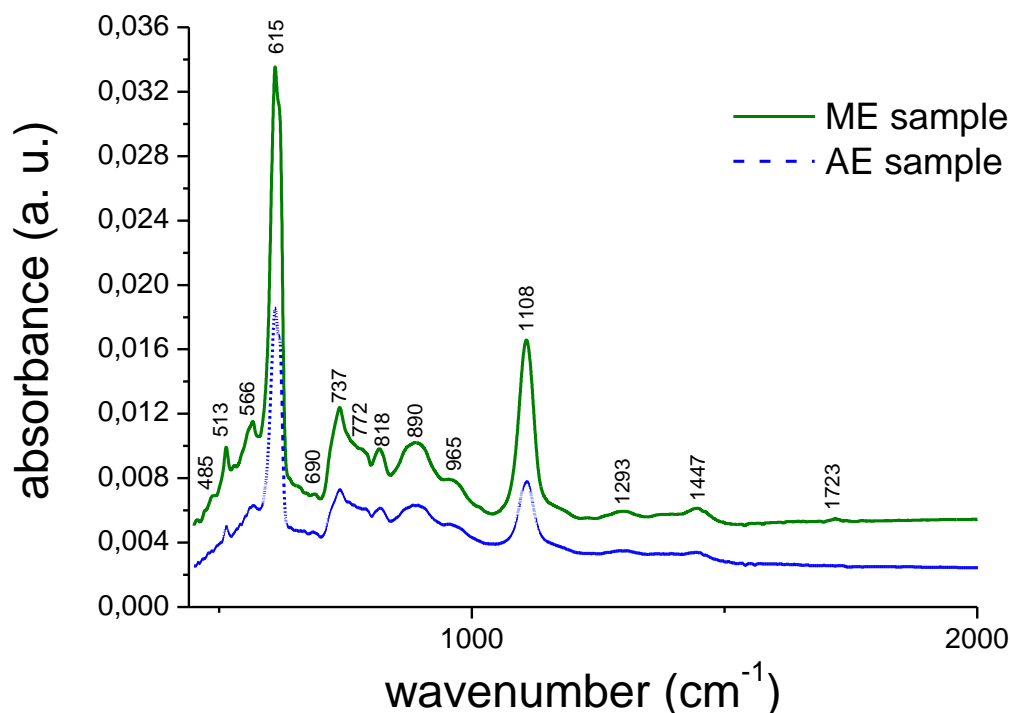

Figure S13. FTIR spectra of PM sampled in auxiliary engine (AE) and main engine (ME) exhaust. Peaks at 485 and 818  $\text{cm}^{-1}$  are linked to the presence of aromatic ring vibrations, medium peaks at 737, 772, 818, 890  $\text{cm}^{-1}$  to C-H out of plane vibrations in aromatics compounds (Socrates, 2004). A weak peak at 1723  $\text{cm}^{-1}$  is probably due to C=O in ketone, ester, anhydride or aldehyde (DEAN'S, 2004). Medium peaks at 513 and 965  $\text{cm}^{-1}$  are due to V-O vibration of the vanadium oxide  $\text{V}_2\text{O}_5$  (Botto et al., 1997, Clauws et al., 1985), medium peak at 566  $\text{cm}^{-1}$  and its shoulder at 558  $\text{cm}^{-1}$  come from Fe-O vibration of the iron oxide  $\text{Fe}_3\text{O}_4$  (Namduri et al., 2008). The very strong peak at 615  $\text{cm}^{-1}$ , its shoulder at 620  $\text{cm}^{-1}$  and a weak peak at 690  $\text{cm}^{-1}$  come from the C-S stretching of sulphide compounds (DEAN'S, 2004). The very strong peak at 1108  $\text{cm}^{-1}$  indicates the symmetric stretch of  $\text{SO}_2$  in sulfone, C=S vibrations of thiocarbonyl compounds or C-O-C asymmetric stretch (DEAN'S 2004; Socrates, 2004). A weak peak at 1293  $\text{cm}^{-1}$  are probably linked to C-N stretching in aromatic aryl- $\text{NH}_2$  compounds (DEAN'S, 2004). A weak peak at 1447  $\text{cm}^{-1}$  can correspond to C-N-H bending in amide compounds (DEAN'S, 2004) or ammonium ion  $\text{NH}_4^+$  (Maria et al., 2002).

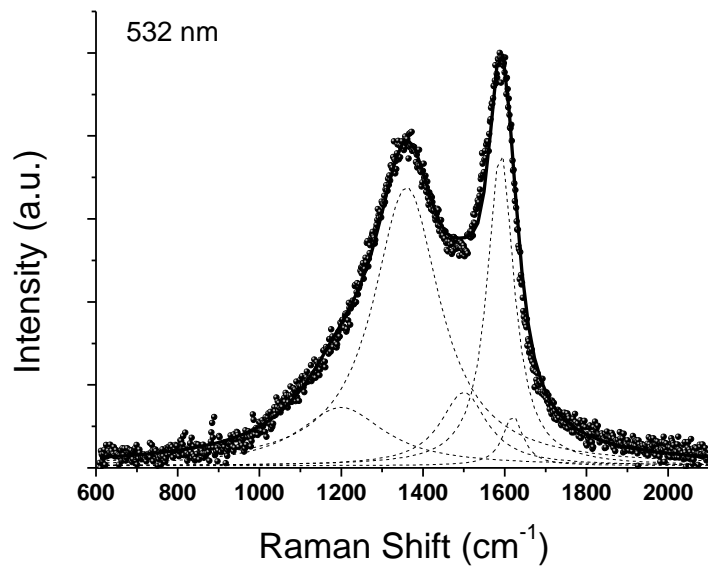

Figure S14. Raman spectra of the cumulative S1\_MGO1%\_ME sample. Five bands are identified (Sadezky et al., 2005): G, D<sub>1</sub>, D<sub>2</sub>, D<sub>3</sub>, and D<sub>4</sub>. The G band (1580 cm<sup>-1</sup>) corresponds to the E<sub>2g</sub> symmetry mode of the graphite lattice. The D<sub>1</sub> band (1350 cm<sup>-1</sup>) originates from A<sub>1g</sub> symmetry mode in disordered graphite; D<sub>2</sub> band (1620 cm<sup>-1</sup>) - from E<sub>2g</sub> symmetry stretching mode of disordered graphite; D<sub>3</sub> band (1500 cm<sup>-1</sup>) is related to amorphous carbon (a mixture of sp<sup>2</sup> and sp<sup>3</sup>); and D<sub>4</sub> band (1200 cm<sup>-1</sup>) is assigned to A<sub>1g</sub> symmetry mode of disordered graphite.
